# Supplementary material
Source: publisher figshare collection journal article supplement (https://tandf.figshare.com/ndownloader/files/26077956)
Supplement: Supplementary file 1 [file 26077956]

# Online materials

## Stimulus lists used in the study

| **Event ID** | **Event Type** | **Stimulus list A1** | | **Stimulus list A2** | | **Stimulus list B1** | | **Stimulus list B2** | |
| --- | --- | --- | --- | --- | --- | --- | --- | --- | --- |
| **List A**  **(videos)** | **List 1**  **(Images)** | **List A**  **(videos)** | **List 2**  **(Images)** | **List B**  **(videos)** | **List 1**  **(Images)** | **List B**  **(videos)** | **List 2**  **(Images)** |
| A01 | Resultative | Ceased | Ceased | Ceased | Ongoing | Ongoing | Ceased | Ongoing | Ongoing |
| A02 | Resultative | Ceased | Ceased | Ceased | Ongoing | Ongoing | Ceased | Ongoing | Ongoing |
| A03 | Resultative | Ceased | Ceased | Ceased | Ongoing | Ongoing | Ceased | Ongoing | Ongoing |
| A04 | Resultative | Ceased | Ongoing | Ceased | Ceased | Ongoing | Ongoing | Ongoing | Ceased |
| A05 | Resultative | Ceased | Ongoing | Ceased | Ceased | Ongoing | Ongoing | Ongoing | Ceased |
| A06 | Resultative | Ceased | Ongoing | Ceased | Ceased | Ongoing | Ongoing | Ongoing | Ceased |
| A07 | Resultative | Ongoing | Ceased | Ongoing | Ongoing | Ceased | Ceased | Ceased | Ongoing |
| A08 | Resultative | Ongoing | Ceased | Ongoing | Ongoing | Ceased | Ceased | Ceased | Ongoing |
| A09 | Resultative | Ongoing | Ceased | Ongoing | Ongoing | Ceased | Ceased | Ceased | Ongoing |
| A10 | Resultative | Ongoing | Ongoing | Ongoing | Ceased | Ceased | Ongoing | Ceased | Ceased |
| A11 | Resultative | Ongoing | Ongoing | Ongoing | Ceased | Ceased | Ongoing | Ceased | Ceased |
| A12 | Resultative | Ongoing | Ongoing | Ongoing | Ceased | Ceased | Ongoing | Ceased | Ceased |
| B01 | Non-resultative | Ceased | Ceased | Ceased | Ongoing | Ongoing | Ceased | Ongoing | Ongoing |
| B02 | Non-resultative | Ceased | Ceased | Ceased | Ongoing | Ongoing | Ceased | Ongoing | Ongoing |
| B03 | Non-resultative | Ceased | Ceased | Ceased | Ongoing | Ongoing | Ceased | Ongoing | Ongoing |
| B04 | Non-resultative | Ceased | Ongoing | Ceased | Ceased | Ongoing | Ongoing | Ongoing | Ceased |
| B05 | Non-resultative | Ceased | Ongoing | Ceased | Ceased | Ongoing | Ongoing | Ongoing | Ceased |
| B06 | Non-resultative | Ceased | Ongoing | Ceased | Ceased | Ongoing | Ongoing | Ongoing | Ceased |
| B07 | Non-resultative | Ongoing | Ceased | Ongoing | Ongoing | Ceased | Ceased | Ceased | Ongoing |
| B08 | Non-resultative | Ongoing | Ceased | Ongoing | Ongoing | Ceased | Ceased | Ceased | Ongoing |
| B09 | Non-resultative | Ongoing | Ceased | Ongoing | Ongoing | Ceased | Ceased | Ceased | Ongoing |
| B10 | Non-resultative | Ongoing | Ongoing | Ongoing | Ceased | Ceased | Ongoing | Ceased | Ceased |
| B11 | Non-resultative | Ongoing | Ongoing | Ongoing | Ceased | Ceased | Ongoing | Ceased | Ceased |
| B12 | Non-resultative | Ongoing | Ongoing | Ongoing | Ceased | Ceased | Ongoing | Ceased | Ceased |

# *List of types of verbs predicates produced in Spanish*

| **Verb Produced** | **Verb Form** | **Verb Semantics** | **Translation** |
| --- | --- | --- | --- |
| abrochar | Single Verb | Culmination | fasten |
| agitar | Single Verb | Activity | shake |
| agregar | Single Verb | Culmination | add |
| amarrar | Single Verb | Culmination | tie |
| añadir | Single Verb | Culmination | add |
| armar | Single Verb | CoS | assemble |
| barajar | Single Verb | CoS | shuffle |
| batir | Single Verb | Activity | whisk |
| beber | Single Verb | CoS | drink |
| colocar | Single Verb | Activity | put |
| comer | Single Verb | CoS | eat |
| completar | Single Verb | Culmination | complete |
| construir | Single Verb | CoS | build |
| corchetear | Single Verb | Culmination | staple |
| cortar | Single Verb | CoS | cut |
| echar | Single Verb | Activity | throw |
| embarrar | Single Verb | CoS | smear |
| engrapar | Single Verb | Culmination | staple |
| enmadejar | Single Verb | Culmination | roll |
| enredar | Single Verb | Culmination | roll |
| enrollar | Single Verb | CoS | roll |
| envolver | Single Verb | Culmination | wrap |
| esparcir | Single Verb | CoS | spread |
| fondear | Single Verb | Culmination | drink up |
| grapar | Single Verb | Culmination | staple |
| hacer | Single Verb | CoS | do |
| hilar | Single Verb | Culmination | spin |
| jugar | Single Verb | Activity | play |
| juntar | Single Verb | Activity | gather |
| limpiar | Single Verb | CoS | clean |
| llenar | Single Verb | Culmination | fill |
| medir | Single Verb | Activity | measure |
| menear | Single Verb | Activity | wag |
| mezclar | Single Verb | CoS | mix |
| mover | Single Verb | Activity | move |
| ordenar | Single Verb | CoS | order |
| partir | Single Verb | Culmination | split |
| pelar | Single Verb | Culmination | peel |
| poner | Single Verb | Activity | put |
| preparar | Single Verb | CoS | prepare |
| quitar | Single Verb | CoS | remove |
| rajar | Single Verb | Culmination | slit |
| rasgar | Single Verb | Culmination | tear |
| recoger | Single Verb | Culmination | collect |
| recortar | Single Verb | CoS | cut out |
| remover | Single Verb | Activity | remove |
| revolver | Single Verb | Activity | mix |
| rodajear | Single Verb | Culmination | slice |
| romper | Single Verb | Culmination | break |
| salar | Single Verb | Culmination | salt |
| secar | Single Verb | Culmination | dry |
| servir | Single Verb | Activity | serve |
| terminar | Single Verb | Culmination | finish |
| tomar | Single Verb | CoS | drink |
| untar | Single Verb | CoS | smear |
| usar | Single Verb | Activity | use |
| verter | Single Verb | CoS | pour |

## List of types of verbs predicates produced in Mandarin

| **Verb Produced** | **Transliteration** | **Verb Form** | **Verb Semantics** | **Translation** |
| --- | --- | --- | --- | --- |
| 掰 | bāi | Single Verb | Activity | break |
| 掰成 | bāi-chéng | Verb-Satellite | CoS | break-into |
| 掰开 | bāi-kāi | Verb-Satellite | Culmination | break-open |
| 掰碎 | bāi-suì | Verb-Satellite | Culmination | break-pieces |
| 拌 | bàn | Single Verb | Activity | swirl |
| 剥 | bō | Single Verb | Activity | peel |
| 剥好 | bō-hǎo | Verb-Satellite | Culmination | peel-good |
| 剥开 | bō-kāi | Verb-Satellite | Culmination | peel-open |
| 剥完 | bō-wán | Verb-Satellite | Culmination | peel-complete |
| 剥下来 | bō-xiàlái | Verb-Satellite | CoS | peel-down |
| 擦 | cā | Single Verb | Activity | rub |
| 擦掉 | cā-diào | Verb-Satellite | Culmination | rub-away |
| 擦干 | cā-gān | Verb-Satellite | Culmination | rub-dry |
| 擦干净 | cā-gānjìng | Verb-Satellite | Culmination | rub-clean |
| 裁 | cái | Single Verb | CoS | cut |
| 擦拭 | cāshì | Single Verb | Activity | wipe |
| 测量 | cèliáng | Single Verb | Activity | measure |
| 缠 | chán | Single Verb | Activity | roll |
| 缠起来 | chán-qǐlái | Verb-Satellite | CoS | roll-up |
| 缠绕起来 | chánrào-qǐlái | Verb-Satellite | CoS | roll-up |
| 打 | dǎ | Single Verb | Activity | whisk |
| 搭 | dā | Single Verb | Activity | build |
| 倒 | dào | Single Verb | Activity | pour |
| 倒满 | dào-mǎn | Verb-Satellite | Culmination | pour-full |
| 倒完 | dào-wán | Verb-Satellite | CoS | pour-complete |
| 叠 | dié | Single Verb | Activity | pile |
| 叠起来 | dié-qǐlái | Verb-Satellite | CoS | pile-up |
| 订 | dìng | Single Verb | Activity | staple |
| 堆 | duī | Single Verb | Activity | pile |
| 放 | fàng | Single Verb | Activity | put |
| 分开 | fēn-kāi | Verb-Satellite | Culmination | divide-open |
| 喝 | hē | Single Verb | Activity | drink |
| 喝完 | hē-wán | Verb-Satellite | Culmination | drink-complete |
| 喝下 | hē-xià | Verb-Satellite | Activity | drink-down |
| 加 | jiā | Single Verb | Activity | add |
| 剪 | jiǎn | Single Verb | Activity | cut |
| 剪成 | jiǎn-chéng | Verb-Satellite | CoS | cut-into |
| 剪开 | jiǎn-kāi | Verb-Satellite | Culmination | cut-open |
| 剪齐 | jiǎn-qí | Verb-Satellite | Culmination | cut-neat |
| 剪碎 | jiǎn-suì | Verb-Satellite | CoS | cut-pieces |
| 剪下来 | jiǎn-xiàlái | Verb-Satellite | CoS | cut-down |
| 搅 | jiǎo | Single Verb | Activity | stir |
| 搅拌 | jiǎobàn | Single Verb | CoS | stir |
| 搅动 | jiǎodòng | Single Verb | CoS | stir |
| 卷 | juǎn | Single Verb | Activity | roll |
| 捆 | kǔn | Single Verb | Activity | bundle |
| 捆起来 | kǔn-qǐlái | Verb-Satellite | CoS | bundle-up |
| 量 | liàng | Single Verb | Activity | measure |
| 摞起来 | luò-qǐlái | Verb-Satellite | Culmination | pile-up |
| 抹 | mǒ | Single Verb | Activity | smear |
| 抹到 | mǒ-dào | Verb-Satellite | CoS | smear-to |
| 拼 | pīn | Single Verb | Activity | put-together |
| 拼上 | pīn-shàng | Verb-Satellite | CoS | put-together-on |
| 切 | qiè | Single Verb | Activity | cut |
| 切成 | qiè-chéng | Verb-Satellite | CoS | cut-into |
| 切开 | qiē-kāi | Verb-Satellite | Culmination | cut-open |
| 绕 | rào | Single Verb | Activity | roll |
| 扔 | rēng | Single Verb | Activity | throw |
| 揉 | róu | Single Verb | Activity | roll |
| 撒 | sā | Single Verb | Activity | sprinkle |
| 撕 | sī | Single Verb | Activity | tear |
| 撕成 | sī-chéng | Verb-Satellite | CoS | tear-into |
| 撕开 | sī-kāi | Verb-Satellite | Culmination | tear-open |
| 贴 | tiē | Single Verb | Activity | stick |
| 贴到 | tiē-dào | Verb-Satellite | CoS | stick-to |
| 涂 | tú | Single Verb | CoS | smear |
| 涂抹 | túmǒ | Single Verb | CoS | smear |
| 玩 | wán | Single Verb | Activity | play |
| 完成 | wánchéng | Single Verb | Activity | finish |
| 洗 | xǐ | Single Verb | Activity | shuffle |
| 用 | yòng | Single Verb | Activity | use |
| 丈量 | zhàngliàng | Single Verb | Activity | measure |
| 整理 | zhěnglǐ | Single Verb | Activity | sort-out |
| 整理好 | zhěnglǐ-hǎo | Verb-Satellite | Culmination | sort-out-good |
| 装订 | zhuāngdìng | Single Verb | Activity | staple |
| 做 | zuò | Single Verb | Activity | do |
| 组装 | zǔzhuāng | Single Verb | CoS | assemble |
